# Supplementary material
Source: PubMed Central journal article supplement (PMC4104692)
Supplement: NIHMS598990-supplement-Supp_Material.pdf [file NIHMS598990-supplement-Supp_Material.pdf]

**Supp. Table S1. Predicted effect of non-synonymous SNVs on IL-12R $\beta$ 1 protein function**

| SNPid       | amino acid change | minor allele frequency <sup>a</sup> | SIFT score     | SIFT prediction | Polyphen2 score | Polyphen2 prediction | Condel score | Condel prediction |
|-------------|-------------------|-------------------------------------|----------------|-----------------|-----------------|----------------------|--------------|-------------------|
| rs17884651  | p.Pro3Gln         | 0.00-0.021                          | 0 <sup>b</sup> | damaging        | 0.001           | benign               | 0.694        | deleterious       |
| rs200783433 | p.Arg25Lys        | n.a.                                | 0.86           | tolerated       | 0.118           | benign               | 0.000        | neutral           |
| rs202206502 | p.Pro34Ser        | 0.001                               | 0.32           | tolerated       | 0.818           | possibly damaging    | 0.024        | neutral           |
| rs113524129 | p.Pro34Leu        | n.a.                                | 0.64           | tolerated       | 0.663           | possibly damaging    | 0.022        | neutral           |
| rs142484991 | p.Pro37Leu        | 0.001                               | 0.89           | tolerated       | 0.994           | probably damaging    | 0.917        | deleterious       |
| rs189309495 | p.Ser43Leu        | 0.001                               | 0.01           | damaging        | 0.538           | possibly damaging    | 0.017        | neutral           |
| rs150070244 | p.Ser45Leu        | 0.000                               | 0.4            | tolerated       | 0.002           | benign               | 0.000        | neutral           |
| rs17887176  | p.Pro47Ser        | 0.010-0.067                         | 0              | damaging        | 1.000           | probably damaging    | 0.990        | deleterious       |
| rs150816599 | p.Arg51Thr        | 0.000                               | 0.48           | tolerated       | 0.019           | benign               | 0.002        | neutral           |
| rs142273743 | p.Arg59His        | 0.000                               | 0.12           | tolerated       | 0.043           | benign               | 0.406        | neutral           |
| rs140770932 | p.Tyr60Cys        | 0.000                               | 0.05           | damaging        | 0.998           | probably damaging    | 0.893        | deleterious       |
| rs117720235 | p.Glu61Lys        | 0.008                               | 0.86           | tolerated       | 0.961           | probably damaging    | 0.017        | neutral           |
| rs138859377 | p.Arg85Cys        | 0.000                               | 0.03           | damaging        | 0.004           | benign               | 0.009        | neutral           |
| rs144128347 | p.Ala90Thr        | 0.000                               | 0.51           | tolerated       | 0.585           | possibly damaging    | 0.081        | neutral           |
| rs150285174 | p.Val107Ala       | 0.000                               | 0.02           | damaging        | 0.104           | benign               | 0.871        | deleterious       |
| rs200328413 | p.Leu183Ser       | n.a.                                | 0.06           | tolerated       | 0.883           | possibly damaging    | 0.754        | deleterious       |
| rs201652727 | p.Pro199Arg       | n.a.                                | 0.78           | tolerated       | 1.000           | probably damaging    | 0.922        | deleterious       |
| rs139505765 | p.Glu201Ala       | 0.006                               | 0.07           | tolerated       | 0.952           | possibly damaging    | 0.766        | deleterious       |

| <b>SNPId</b> | <b>amino acid change</b> | <b>minor allele frequency<sup>a</sup></b> | <b>SIFT score</b> | <b>SIFT prediction</b> | <b>Polyphen2 score</b> | <b>Polyphen2 prediction</b> | <b>Condel score</b> | <b>Condel prediction</b> |
|--------------|--------------------------|-------------------------------------------|-------------------|------------------------|------------------------|-----------------------------|---------------------|--------------------------|
| rs182250241  | p.Met202Arg              | n.a.                                      | 0.62              | tolerated              | 0.000                  | benign                      | 0.001               | neutral                  |
| rs148994509  | p.Gln218Pro              | 0.000                                     | 0.25              | tolerated              | 0.000                  | benign                      | 0.001               | neutral                  |
| rs140762977  | p.Val231Ile              | 0.000                                     | 0.42              | tolerated              | 0.774                  | possibly damaging           | 0.007               | neutral                  |
| rs201567666  | p.Pro232Ser              | n.a.                                      | 0.18              | tolerated              | 1.000                  | probably damaging           | 0.990               | deleterious              |
| rs147436538  | p.Pro232Leu              | 0.001                                     | 0.03              | damaging               | 1.000                  | probably damaging           | 0.990               | deleterious              |
| rs200977237  | p.Gln238Glu              | 0.001                                     | 0.32              | tolerated              | 0.067                  | benign                      | 0.057               | neutral                  |
| rs200203598  | p.Ser244Leu              | 0.001                                     | 0.33              | tolerated              | 0.074                  | benign                      | 0.001               | neutral                  |
| rs138189707  | p.Leu258Val              | 0.000                                     | 0.01              | damaging               | 0.910                  | possibly damaging           | 0.681               | deleterious              |
| rs200508693  | p.Leu267Pro              | 0.001                                     | 0.34              | tolerated              | 1.000                  | probably damaging           | 0.828               | deleterious              |
| rs150555147  | p.Leu274Gln              | 0.000                                     | 0.63              | tolerated              | 0.229                  | benign                      | 0.002               | neutral                  |
| rs201831465  | p.Ala275Val              | 0.001                                     | 0.32              | tolerated              | 0.701                  | possibly damaging           | 0.256               | neutral                  |
| rs201223132  | p.Thr278Met              | n.a.                                      | 0.22              | tolerated              | 0.052                  | benign                      | 0.011               | neutral                  |
| rs117511121  | p.Arg283Gln              | 0.004-0.017                               | 0.7               | tolerated              | 0.019                  | benign                      | 0.006               | neutral                  |
| rs149896994  | p.Pro292Leu              | 0.000                                     | 0.85              | tolerated              | 0.987                  | probably damaging           | 0.327               | neutral                  |
| rs112658457  | p.Thr298Ala              | n.a.                                      | 0.86              | tolerated              | 0.011                  | benign                      | 0.024               | neutral                  |
| rs192185254  | p.Tyr308Cys              | n.a.                                      | 0.19              | tolerated              | 0.913                  | possibly damaging           | 0.051               | neutral                  |
| rs34844088   | p.Val316Met              | 0.000                                     | 0.02              | damaging               | 0.974                  | probably damaging           | 0.255               | neutral                  |
| rs141507253  | p.Ser320Pro              | 0.000                                     | 0.01              | damaging               | 0.998                  | probably damaging           | 0.736               | deleterious              |
| rs147766868  | p.Ser321Leu              | 0.000                                     | 0.63              | tolerated              | 0.531                  | possibly damaging           | 0.019               | neutral                  |
| rs144612211  | p.Gly325Ser              | 0.000                                     | 0.01              | damaging               | 1.000                  | probably                    | 0.990               | deleterious              |

| SNPId       | amino acid change | minor allele frequency <sup>a</sup> | SIFT score | SIFT prediction | Polyphen2 score | Polyphen2 prediction | Condel score | Condel prediction |
|-------------|-------------------|-------------------------------------|------------|-----------------|-----------------|----------------------|--------------|-------------------|
| rs137983313 | p.Asp337Glu       | 0.000                               | 1          | tolerated       | 0.031           | benign               | 0.004        | neutral           |
| rs17884957  | p.His339Gln       | 0.002-0.022                         | 0.3        | tolerated       | 0.156           | benign               | 0.010        | neutral           |
| rs200811721 | p.Gly350Arg       | 0.002                               | 0.33       | tolerated       | 0.999           | probably damaging    | 0.774        | deleterious       |
| rs111768826 | p.Gly353Glu       | n.a.                                | 1          | tolerated       | 0.868           | possibly damaging    | 0.023        | neutral           |
| rs150261140 | p.Arg361Gly       | 0.000                               | 0.23       | tolerated       | 0.826           | possibly damaging    | 0.052        | neutral           |
| rs191062711 | p.Ala387Val       | n.a.                                | 0.65       | tolerated       | 0.231           | benign               | 0.000        | neutral           |
| rs140254802 | p.Pro391Leu       | 0.000                               | 0.28       | tolerated       | 0.014           | benign               | 0.058        | neutral           |
| rs202048215 | p.Arg403Gln       | n.a.                                | 0.52       | tolerated       | 0.019           | benign               | 0.003        | neutral           |
| rs199504990 | p.Gly406Glu       | n.a.                                | 0.96       | tolerated       | 0.745           | possibly damaging    | 0.893        | deleterious       |
| rs201548803 | p.Ser421Phe       | n.a.                                | 0.17       | tolerated       | 0.938           | possibly damaging    | 0.962        | deleterious       |
| rs200875188 | p.Thr432Met       | n.a.                                | 0.03       | damaging        | 0.998           | probably damaging    | 1.000        | deleterious       |
| rs190491500 | p.Asn442Lys       | n.a.                                | 0.4        | tolerated       | 0.954           | possibly damaging    | 0.932        | deleterious       |
| rs150767749 | p.Ser444Leu       | n.a.                                | 0.11       | tolerated       | 0.999           | probably damaging    | 0.950        | deleterious       |
| rs142884929 | p.Val477Ile       | 0.000                               | 0.77       | tolerated       | 1.000           | probably damaging    | 0.772        | deleterious       |
| rs199661046 | p.Arg484His       | n.a.                                | 0.59       | tolerated       | 1.000           | probably damaging    | 0.952        | deleterious       |
| rs11575932  | p.Pro534Ser       | n.a.                                | 0.37       | tolerated       | 1.000           | probably damaging    | 0.827        | deleterious       |
| rs186935027 | p.Ile590Phe       | n.a.                                | 0.11       | tolerated       | 0.838           | possibly damaging    | 0.030        | neutral           |
| rs201846511 | p.Ile590Met       | n.a.                                | 0.12       | tolerated       | 0.838           | possibly             | 0.051        | neutral           |

| <b>SNPid</b> | <b>amino acid change</b> | <b>minor allele frequency<sup>a</sup></b> | <b>SIFT score</b> | <b>SIFT prediction</b> | <b>Polyphen2 score</b> | <b>Polyphen2 prediction</b> | <b>Condel score</b> | <b>Condel prediction</b> |
|--------------|--------------------------|-------------------------------------------|-------------------|------------------------|------------------------|-----------------------------|---------------------|--------------------------|
| rs145590794  | p.Val605Leu              | n.a.                                      | 0.22              | tolerated              | 0.118                  | benign                      | 0.011               | neutral                  |
| rs111662740  | p.Ser612Phe              | n.a.                                      | 0.69              | tolerated              | 0.316                  | benign                      | 0.024               | neutral                  |
| rs143367415  | p.Glu627Lys              | 0.001-0.002                               | 0.56              | tolerated              | 0.886                  | possibly damaging           | 0.192               | neutral                  |
| rs202106699  | p.Asp654Asn              | n.a.                                      | 0 <sup>b</sup>    | damaging               | 0.948                  | possibly damaging           | 0.890               | deleterious              |

<sup>a</sup> data from dbSNP, <sup>b</sup> low confidence prediction, n.a. = not available. SIFT scores and predictions are based on amino acid sequence homology [Kumar et al., 2009]. Polyphen2 scores and predictions are based on amino acid sequence conservation, structure and SWISS-PROT annotation [Adzhubei et al., 2010]. Condel scores and predictions are based on the weighted average of scores of five different prediction tools (a.o. SIFT and Polyphen2) [Gonzalez-Perez and Lopez-Bigas, 2011].

**Supp. Table S2. Associations of *IL12RB1* polymorphisms with disease**

| <b>Cohort</b>                                     | <b>allele or haplotype</b> | <b>in patients<br/>n (%)</b> | <b>in controls<br/>n (%)</b> | <b>p-value</b>       | <b>reference</b>            |
|---------------------------------------------------|----------------------------|------------------------------|------------------------------|----------------------|-----------------------------|
| 98 TB patients<br>197 controls,<br>Southern Japan | QMG                        | 104 (53%)                    | 252 (64%)                    |                      | [Akahoshi et al., 2003]     |
|                                                   | RTR                        | 92 (47%)                     | 142 (36%)                    | <0.013 <sup>a</sup>  |                             |
| 86 TB patients<br>249 controls,<br>Southern Japan | QMG                        | 93 (48.3%)                   | 298 (59.8%)                  | <0.0063 <sup>b</sup> | [Kusuhara et al., 2007]     |
|                                                   | RTR                        | 85 (49.4%)                   | 182 (36.5%)                  |                      |                             |
|                                                   | other                      | 4 (2.3%)                     | 18 (3.7%)                    |                      |                             |
| 101 TB families,<br>Morocco                       | -2C                        | n.a.                         | n.a.                         |                      | [Remus et al., 2004]        |
|                                                   | -2T                        | n.a.                         | n.a.                         | 0.013                |                             |
|                                                   | -111A                      | n.a.                         | n.a.                         |                      |                             |
|                                                   | -111T                      | n.a.                         | n.a.                         | 0.019                |                             |
|                                                   | QMG <sup>c</sup>           | n.a.                         | n.a.                         | 0.4-0.9              |                             |
| 115 TB patients<br>151 controls,<br>Korea         | QMG                        | 160 (69.6%)                  | 193 (63.9%)                  | 0.94                 | [Lee et al., 2005]          |
|                                                   | RTR                        | 69 (30%)                     | 102 (33.8%)                  |                      |                             |
|                                                   | other                      | 1 (0.4%)                     | 7 (2.3%)                     |                      |                             |
|                                                   | 1573G <sup>d</sup>         | 223 (97.0)                   | 291 (96.3)                   | 0.81                 |                             |
|                                                   | 1573A                      | 7 (3.0)                      | 11 (3.7)                     |                      |                             |
| 382 TB patients<br>437 controls,<br>Indonesia     | -2C                        | 590 (94.9%)                  | 587 (94.4%)                  | 0.71                 | [Sahiratmadja et al., 2007] |
|                                                   | -2T                        | 32 (5.1%)                    | 35 (5.6%)                    |                      |                             |
|                                                   | 641A <sup>e</sup>          | 377 (66.1%)                  | 400 (66.4%)                  | 0.91                 |                             |
|                                                   | 641G                       | 193 (33.9%)                  | 202 (33.6%)                  |                      |                             |
|                                                   | 1573G <sup>d</sup>         | 590 (96.4)                   | 578 (96.0)                   | 0.72                 |                             |
| 1573A                                             | 22 (3.6)                   | 24 (4.0)                     |                              |                      |                             |
| 382 AD patients<br>658 controls,                  | -111A                      | 573 (75.0%)                  | 1034 (78.6%)                 | 0.00044 <sup>f</sup> | [Takahashi et al., 2005]    |
|                                                   | -111T                      | 191 (25.0%)                  | 282 (21.4%)                  |                      |                             |

| <b>Cohort</b>                                                | <b>allele or<br/>haplotype</b> | <b>in patients<br/>n (%)</b> | <b>in controls<br/>n (%)</b> | <b>p-value</b>       | <b>reference</b>       |
|--------------------------------------------------------------|--------------------------------|------------------------------|------------------------------|----------------------|------------------------|
| Japan                                                        | -2C                            | 592 (77.5%)                  | 1067 (81.1%)                 | 0.00075 <sup>f</sup> |                        |
|                                                              | -2T                            | 172 (22.5%)                  | 249 (18.9%)                  |                      |                        |
| 304 CA patients                                              | -111A                          | 438 (72.0%)                  | 1034 (78.6%)                 | 0.0020 <sup>g</sup>  |                        |
| 658 controls,                                                | -111T                          | 170 (28.0%)                  | 282 (21.4%)                  |                      |                        |
| Japan                                                        |                                |                              |                              |                      |                        |
| 1946 NHL<br>patients, 1808<br>controls, USA<br>and Australia | rs2305742 A                    | 2849 (79.6%)                 | 3140 (81.8%)                 | 0.013 <sup>h</sup>   | [Lan et al.,<br>2011]  |
|                                                              | rs2305742 C                    | 729 (20.4%)                  | 698 (18.2%)                  |                      |                        |
| 115 SARS<br>patients, 141<br>potentially<br>exposed, China   | QMG <sup>i</sup>               | 111 (59.0%)                  | 131 (58.0%)                  | 0.011 <sup>j</sup>   | [Tang et al.,<br>2008] |
|                                                              | RTRS                           | 50 (26.6%)                   | 25 (11.1%)                   |                      |                        |
|                                                              | RTRP                           | 15 (7.9%)                    | 52 (23.0%)                   | 0.017 <sup>k</sup>   |                        |
|                                                              | other                          | 12 (6.4%)                    | 18 (8.0%)                    |                      |                        |

TB = tuberculosis, AD = atopic dermatitis, CA = childhood asthma, NHL = non-Hodgkin lymphoma, SARS = severe acute respiratory syndrome. <sup>a</sup> p-value for homozygosity of RTR/RTR, <sup>b</sup> protects from TB, <sup>c</sup> two polymorphisms representing the QMG/RTR haplotypes were tested separately, <sup>d</sup> the 1573G>A polymorphism results in the A525T amino acid substitution, <sup>e</sup> the 641A>G polymorphism represents the QMG/RTR haplotype, <sup>f</sup> p-value for comparison of genotypes AA/AT versus TT, <sup>g</sup> p-value for comparison of genotypes, <sup>h</sup> p-value for comparison of genotypes AC/CC versus AA, <sup>i</sup> the P534S substitution is analyzed in combination with the QMG/RTR haplotypes, <sup>j</sup> P534S in the RTR background increases susceptibility to SARS, <sup>k</sup> the RTRP haplotype protects from SARS. n.a.= not available.

### **Supp. References**

Adzhubei IA, Schmidt S, Peshkin L, Ramensky VE, Gerasimova A, Bork P, Kondrashov AS, Sunyaev SR. 2010. A method and server for predicting damaging missense mutations. *Nat Meth* 7:248-249.

Gonzalez-Perez A and Lopez-Bigas N. 2011. Improving the Assessment of the Outcome of Nonsynonymous SNVs with a Consensus Deleteriousness Score, Condel. *Am J Hum Genet* 88:440-449.

Kumar P, Henikoff S, Ng PC. 2009. Predicting the effects of coding non-synonymous variants on protein function using the SIFT algorithm. *Nat Protocols* 4:1073-1081.
